# Supplementary material for: A facile solution-based aluminum oxide interface layer for enhancing the efficiency and stability of perovskite solar cells
Source: Royal Society of Chemistry journal article supplement (doi:10.1039/d4ta01074d), 2024-01-01
Supplement: d4ta01074d1.pdf [file d4ta01074d1.pdf]

## Supporting Information

# A Facile Solution-Based Aluminum Oxide Interface Layer for Enhancing the Efficiency and Stability of Perovskite Solar Cells

Xinning Jiao, Guoqing Ma, Wei-Min Gu, Ke-Jian Jiang\*, Tangyue Xue, Guanghui Yu, Limei Wu, Qing-Wu Zhang, Cai-Yan Gao, Xin-Heng Fan, Lian-Ming Yang\*, Yanlin Song\*

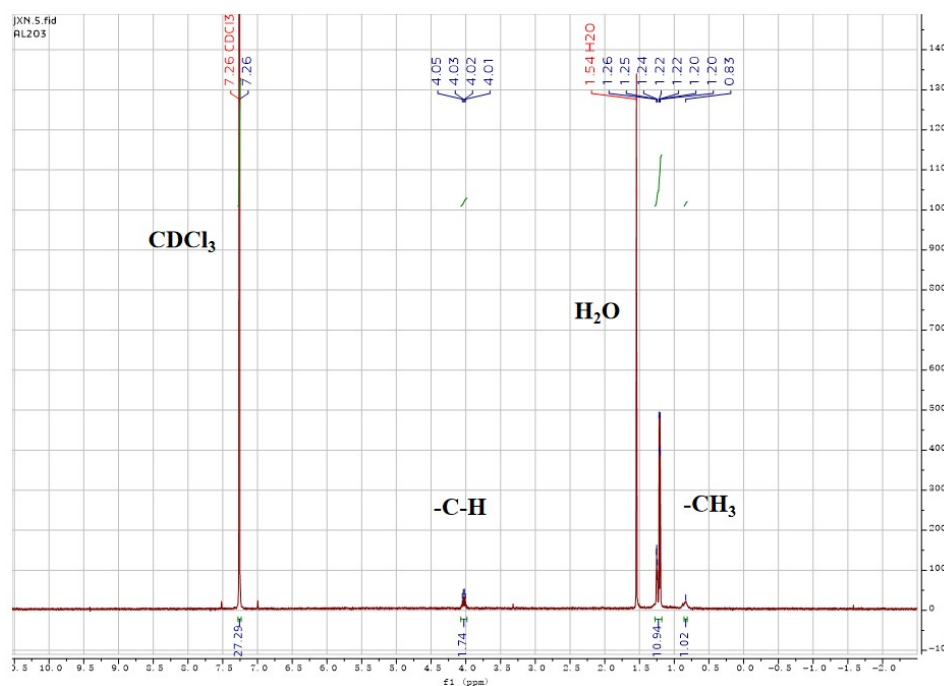

**Figure S1.** <sup>1</sup>H NMR spectra of the Al<sub>2</sub>O<sub>3</sub> sample derived from ATIP. <sup>1</sup>H NMR (400 MHz, CDCl<sub>3</sub>): δ 4.52 (h, 1H, -CH), 1.25 (d, 6H, -CH<sub>3</sub>). The result suggests that a certain amount of aluminum isopropoxide remains in the Al<sub>2</sub>O<sub>3</sub> film.

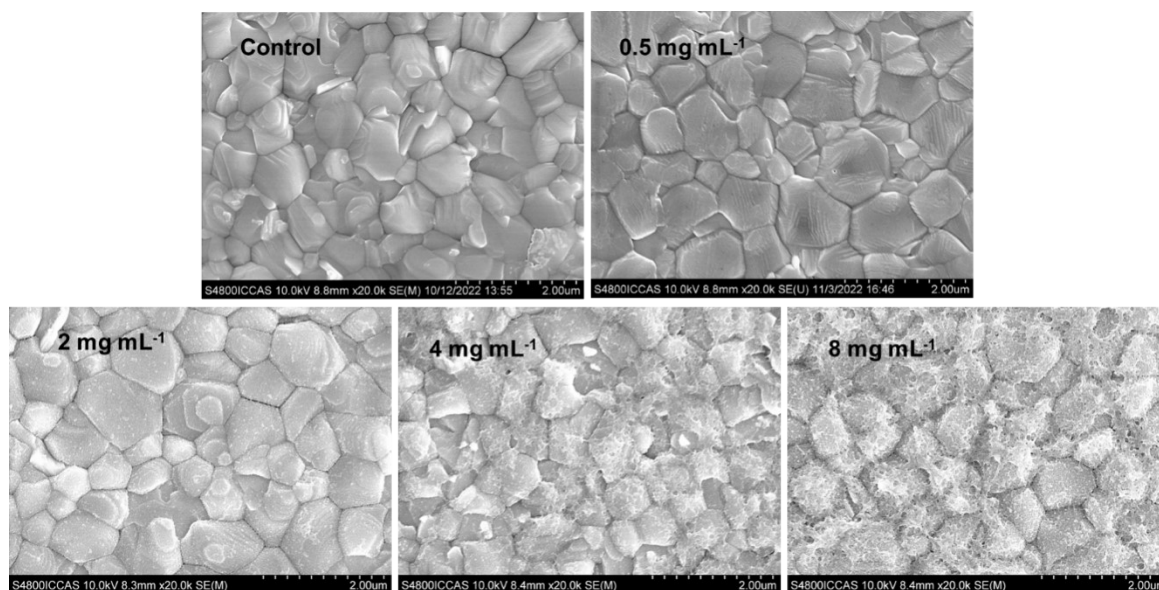

**Figure S2.** Top-view SEM images of the  $\text{Al}_2\text{O}_3$ -modified perovskite films from ATIP solution with various concentrations (0-8  $\text{mg mL}^{-1}$ ).

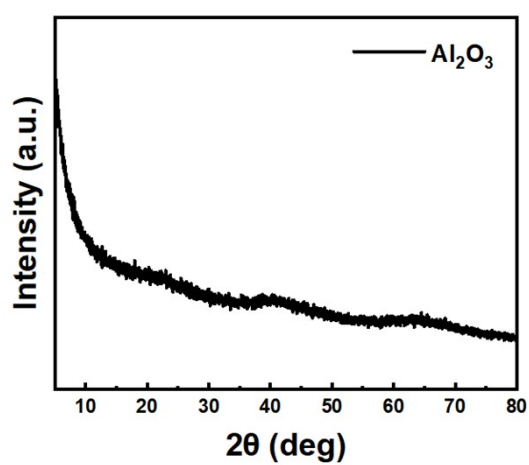

**Figure S3.** XRD patterns of the  $\text{Al}_2\text{O}_3$  film deposited on a glass substrate using ATIP as precursor with thermal annealing at 150 °C in air (RH~40%).

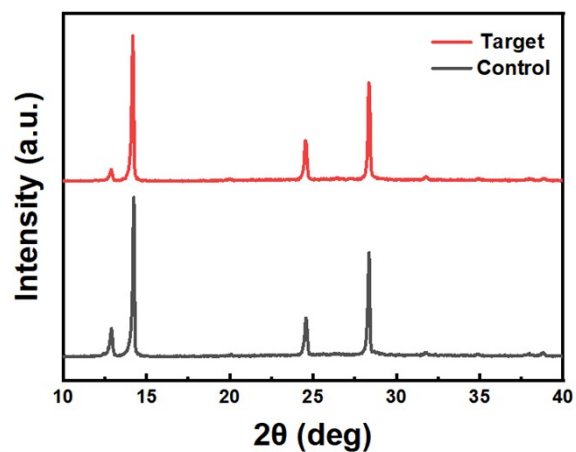

**Figure S4.** XRD patterns of the control (without  $\text{Al}_2\text{O}_3$ ) and target (with  $\text{Al}_2\text{O}_3$ ) perovskite films.

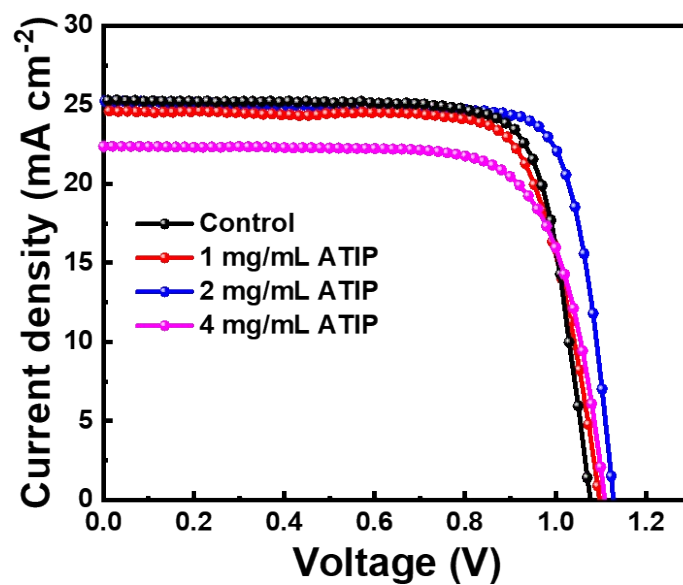

**Figure S5.**  $J$ - $V$  curves of the PSCs modified by  $\text{Al}_2\text{O}_3$  with various concentrations of ATIP.

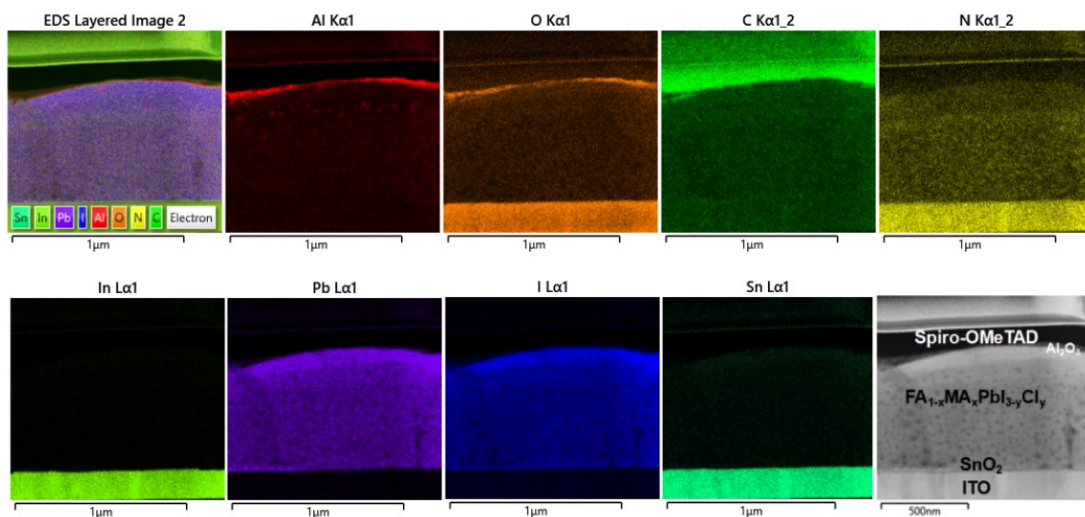

**Figure S6.** High angle annular dark field scanning TEM images of the device with individual and overlapped elemental maps of Al, O, Pb, I, C, N, Sn and In.

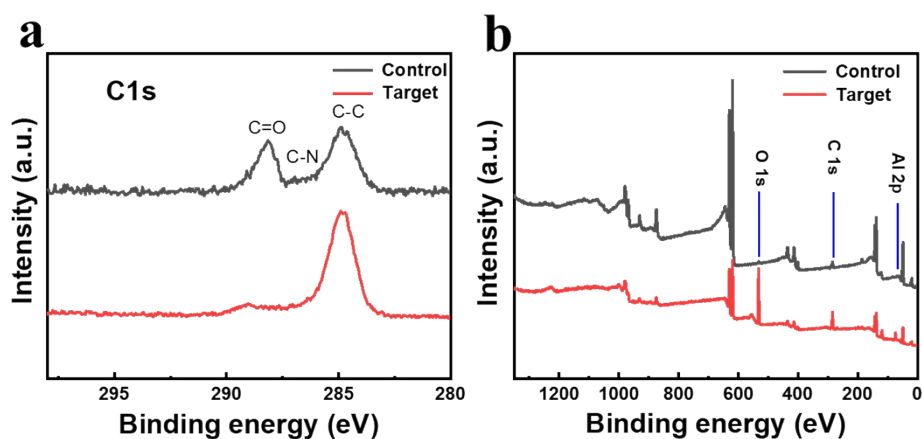

**Figure S7.** X-ray photoelectron spectroscopy (XPS) spectra of C 1s (a), and full XPS spectra (b) of the perovskite films with and without the  $\text{Al}_2\text{O}_3$  modification.

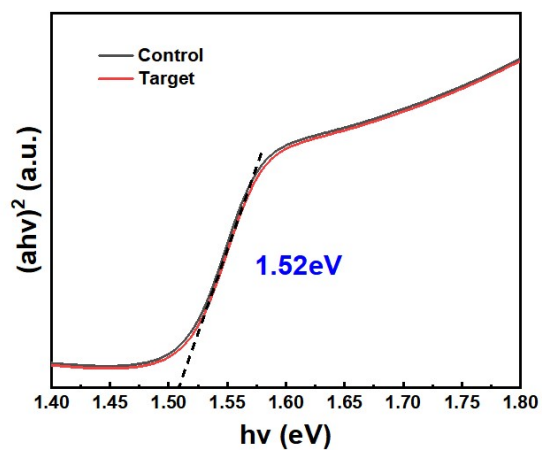

**Figure S8.** Tauc plots of the control and target perovskite films.

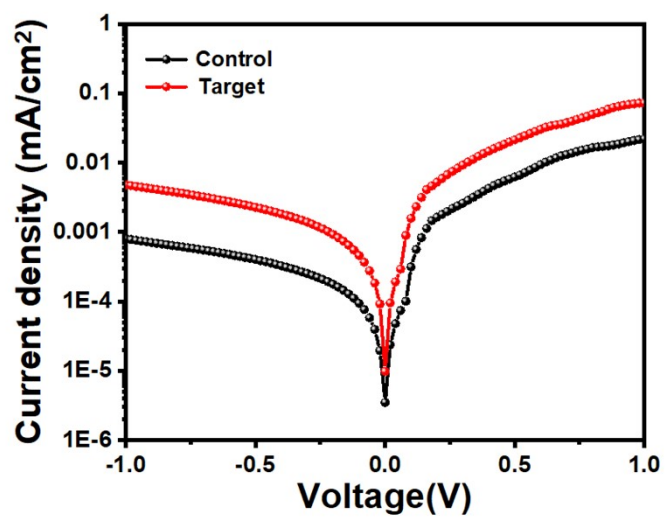

**Figure S9.** Dark  $J-V$  measurements of the control and target PSCs with a configuration of FTO/SnO<sub>2</sub>/perovskite/(Al<sub>2</sub>O<sub>3</sub>)/Spiro-OMeTAD/Ag.

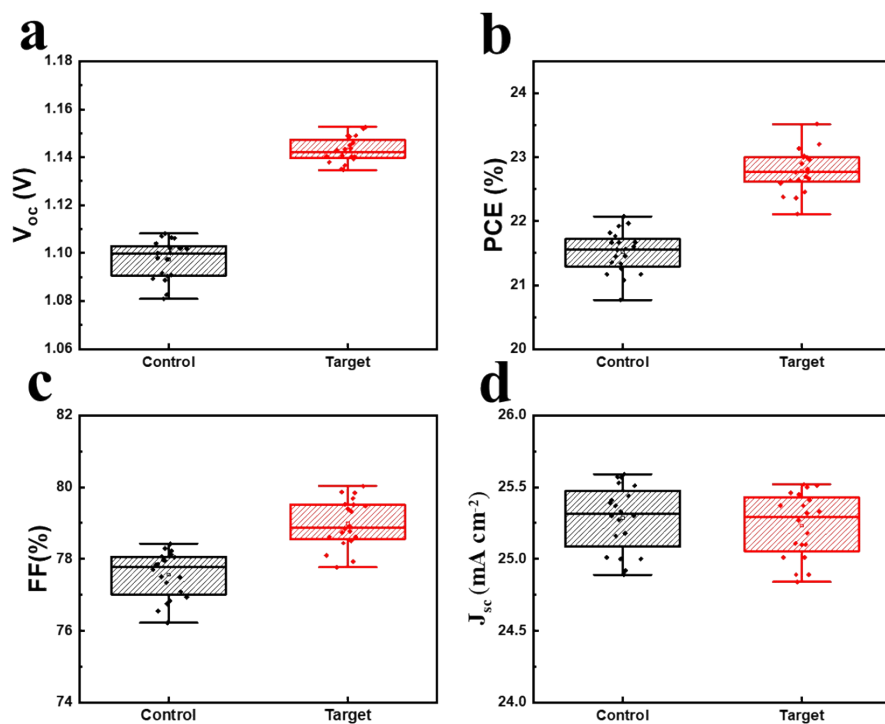

**Figure S10.** Statistic diagrams of  $V_{oc}$  (a), PCE (b),  $FF$  (c), and  $J_{sc}$  (d) from 20 individual devices for each sample.

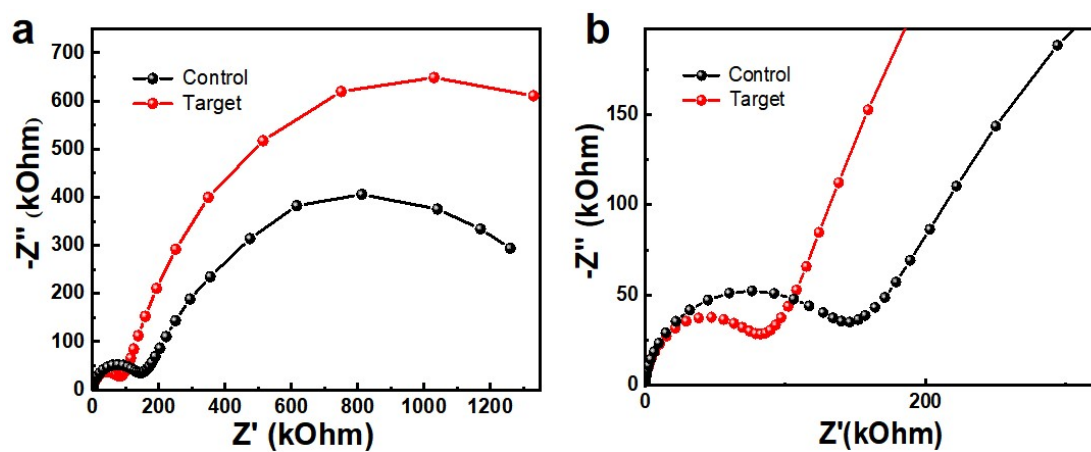

**Figure S11.** Electrical impedance spectra (EIS) of the control and target equipment (a) and corresponding local enlarged image (b).

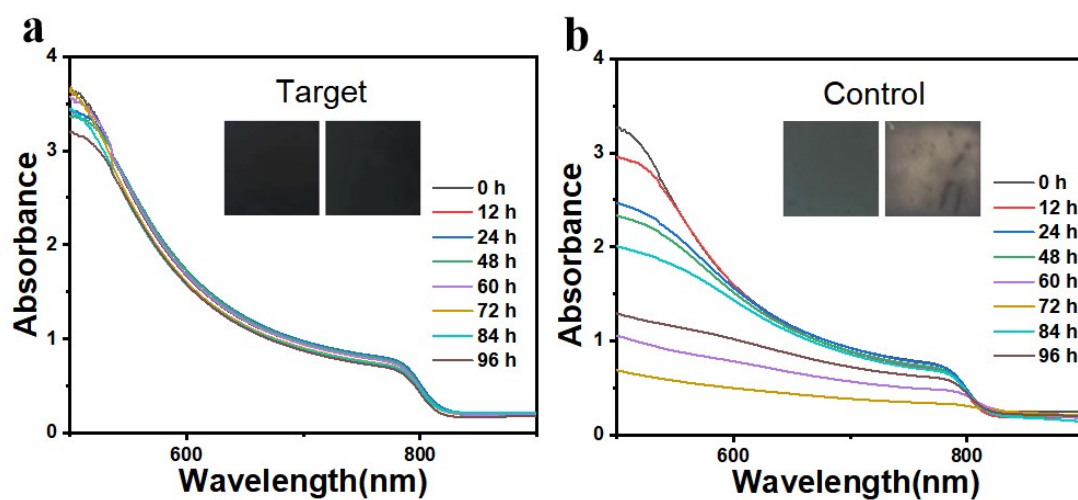

**Figure S12.** UV-vis absorption spectra of the control (a) and target (b) perovskite films stored in air at 25 °C and ~50% RH. Insets are the photographs of corresponding perovskite films before (left) and after (right) light irradiation for 4 days.

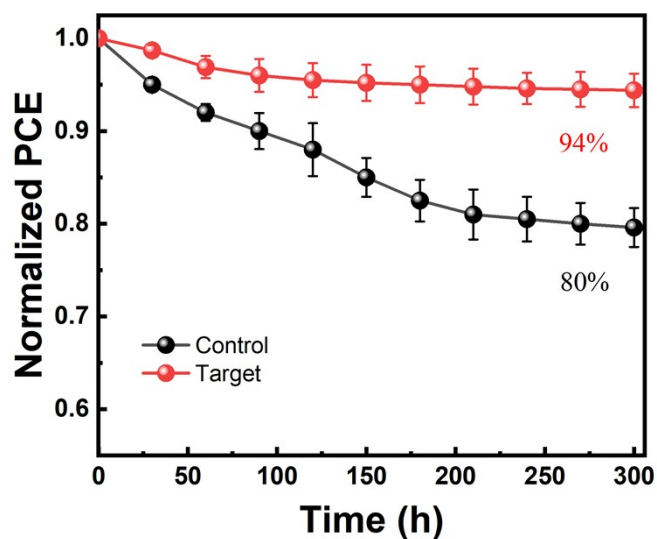

**Figure S13.** Normalized PCE of the control and target devices without encapsulation, stored at 60 °C in a N<sub>2</sub> atmosphere.

**Table S1.** Carrier lifetimes for the control and target perovskite films in Figure 3c.

| Sample  | $\tau_1$ (ns) | $A_1$ | $\tau_2$ (ns) | $A_2$ | $\tau_{\text{avg}}$ (ns) |
|---------|---------------|-------|---------------|-------|--------------------------|
| Control | 577.73        | 53.86 | 2601.63       | 23.14 | 913.18                   |
| Target  | 600.19        | 68.44 | 3508.28       | 32.74 | 1559.04                  |

**Table S2.** The calculated hole mobilities and trap densities for the control and target devices in Figure 3b.

| Device  | $V_{\text{TFL}}$ [V] | Hole $N_{\text{trap}}$ [ $\text{cm}^{-3}$ ] |
|---------|----------------------|---------------------------------------------|
| Control | 0.36                 | $4.0 \times 10^{15}$                        |
| Target  | 0.23                 | $2.6 \times 10^{15}$                        |
